# Supplementary material
Source: Springer Nature journal article supplement (https://www.springermedizin.de/resource/supplementary/13019_2013_1427_MOESM7_ESM.pdf/9640642)
Supplement: MOESM7 [file 9640642]

| Model  | Study name  | Statistics for each study |             |             |         |         | Odds ratio and 95% CI |      |      |       |        |
|--------|-------------|---------------------------|-------------|-------------|---------|---------|-----------------------|------|------|-------|--------|
|        |             | Odds ratio                | Lower limit | Upper limit | Z-Value | p-Value | 0.01                  | 0.10 | 1.00 | 10.00 | 100.00 |
|        | Finci       | 1.702                     | 0.396       | 7.321       | 0.714   | 0.475   |                       |      |      |       |        |
|        | ivanhoe     | 0.247                     | 0.061       | 1.003       | -1.955  | 0.051   |                       |      |      |       |        |
|        | angioi      | 0.367                     | 0.096       | 1.397       | -1.470  | 0.141   |                       |      |      |       |        |
|        | noguchi     | 0.283                     | 0.110       | 0.725       | -2.630  | 0.009   |                       |      |      |       |        |
|        | suero       | 0.669                     | 0.540       | 0.829       | -3.674  | 0.000   |                       |      |      |       |        |
|        | olivari     | 0.283                     | 0.056       | 1.428       | -1.529  | 0.126   |                       |      |      |       |        |
|        | hoye        | 0.520                     | 0.321       | 0.841       | -2.663  | 0.008   |                       |      |      |       |        |
|        | drozd       | 0.738                     | 0.230       | 2.368       | -0.510  | 0.610   |                       |      |      |       |        |
|        | aziz        | 0.248                     | 0.095       | 0.648       | -2.846  | 0.004   |                       |      |      |       |        |
|        | prasad      | 0.818                     | 0.621       | 1.077       | -1.432  | 0.152   |                       |      |      |       |        |
|        | valenti     | 0.382                     | 0.189       | 0.772       | -2.681  | 0.007   |                       |      |      |       |        |
|        | labriolle   | 1.108                     | 0.221       | 5.563       | 0.125   | 0.901   |                       |      |      |       |        |
|        | zhuyanbin   | 0.709                     | 0.193       | 2.602       | -0.518  | 0.605   |                       |      |      |       |        |
|        | Yixianhua   | 0.358                     | 0.231       | 0.553       | -4.623  | 0.000   |                       |      |      |       |        |
|        | chenshaolia | 0.087                     | 0.014       | 0.560       | -2.572  | 0.010   |                       |      |      |       |        |
| Fixed  |             | 0.597                     | 0.520       | 0.686       | -7.323  | 0.000   |                       |      |      |       |        |
| Random |             | 0.501                     | 0.384       | 0.654       | -5.089  | 0.000   |                       |      |      |       |        |
